# Supplementary material for: Influence of carbonization conditions on luminescence and gene delivery properties of nitrogen-doped carbon dots
Source: PubMed Central journal article supplement — RSC Adv. 2019 Jan 25;9(6):3493–502. doi: 10.1039/c8ra09651a (PMC9060250; doi:10.1039/c8ra09651a), 2019-01-25
Supplement: RA-009-C8RA09651A-s001.pdf [file RA-009-C8RA09651A-s001.pdf]

**Influence of carbonization conditions on luminescence and gene delivery  
properties of nitrogen-doped carbon dots**

Claudel Mickaël, Fan Jiahui, Rapp Mickaël, Pons Françoise, Lebeau Luc

**Supplementary information**

Figure S1.  $^1\text{H-NMR}$  spectra of **CD1-CD11**.

Figure S2. FT-IR spectra of **CD1-CD11**.

Figure S3. Absorption and PL spectra of the CDs.

Figure S4. Cytotoxicity of **CD11**.

Table S1. Elemental analysis for **CD1-CD11**.

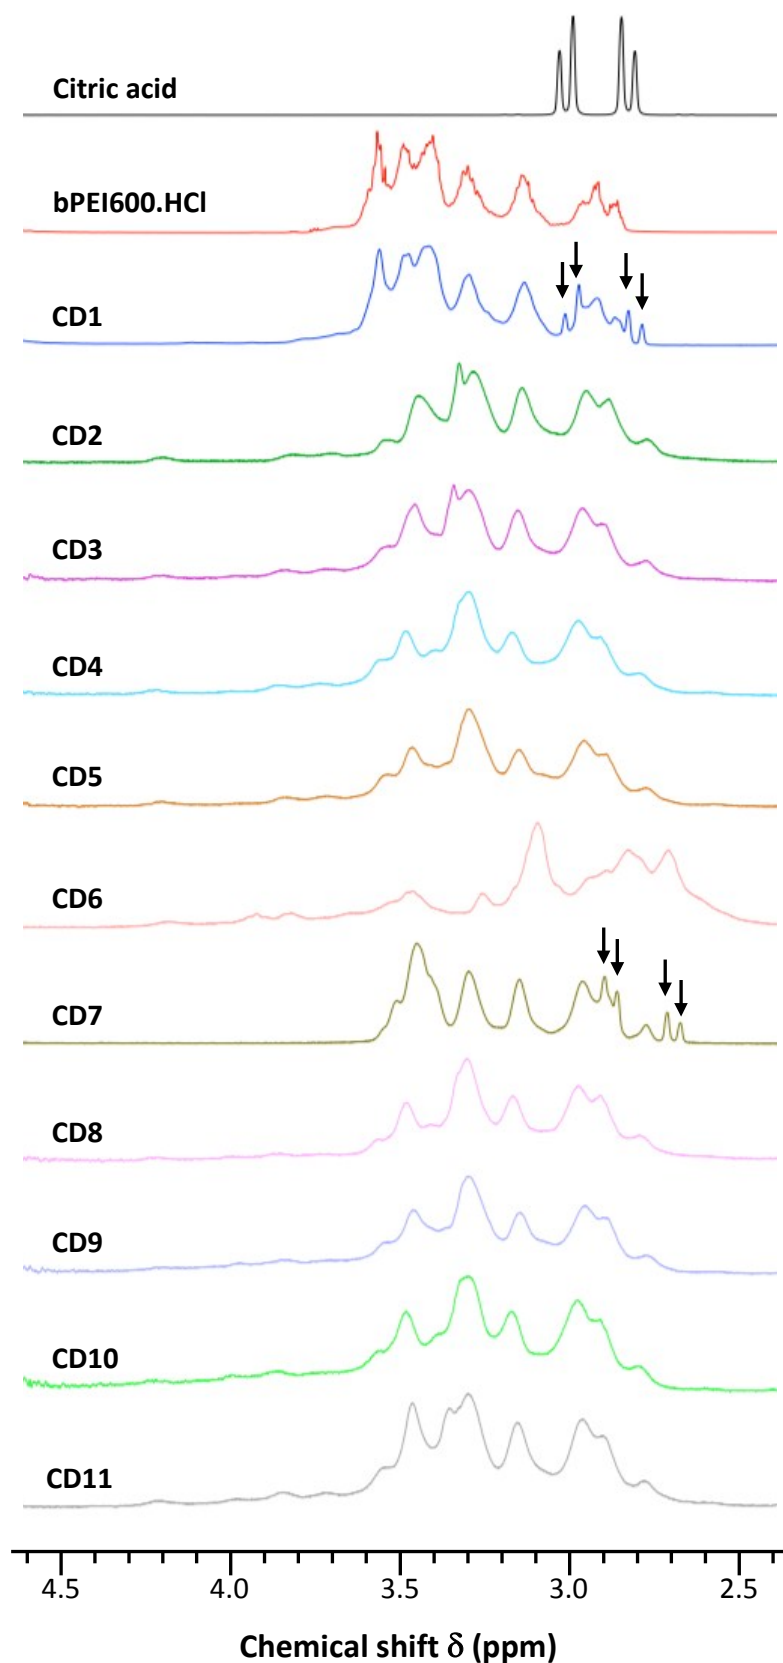

**Fig. S1** <sup>1</sup>H-NMR spectra (400 MHz) recorded for **CD1-CD11**, citric acid and bPEI600 (previously freeze-dried in HCl 1 N) in D<sub>2</sub>O. The presence of a characteristic AB system at 2.8-2.9 ppm (indicated by arrows) suggested the existence of citrate moieties or associated methylene groups at the surface of **CD1** and **CD7**.

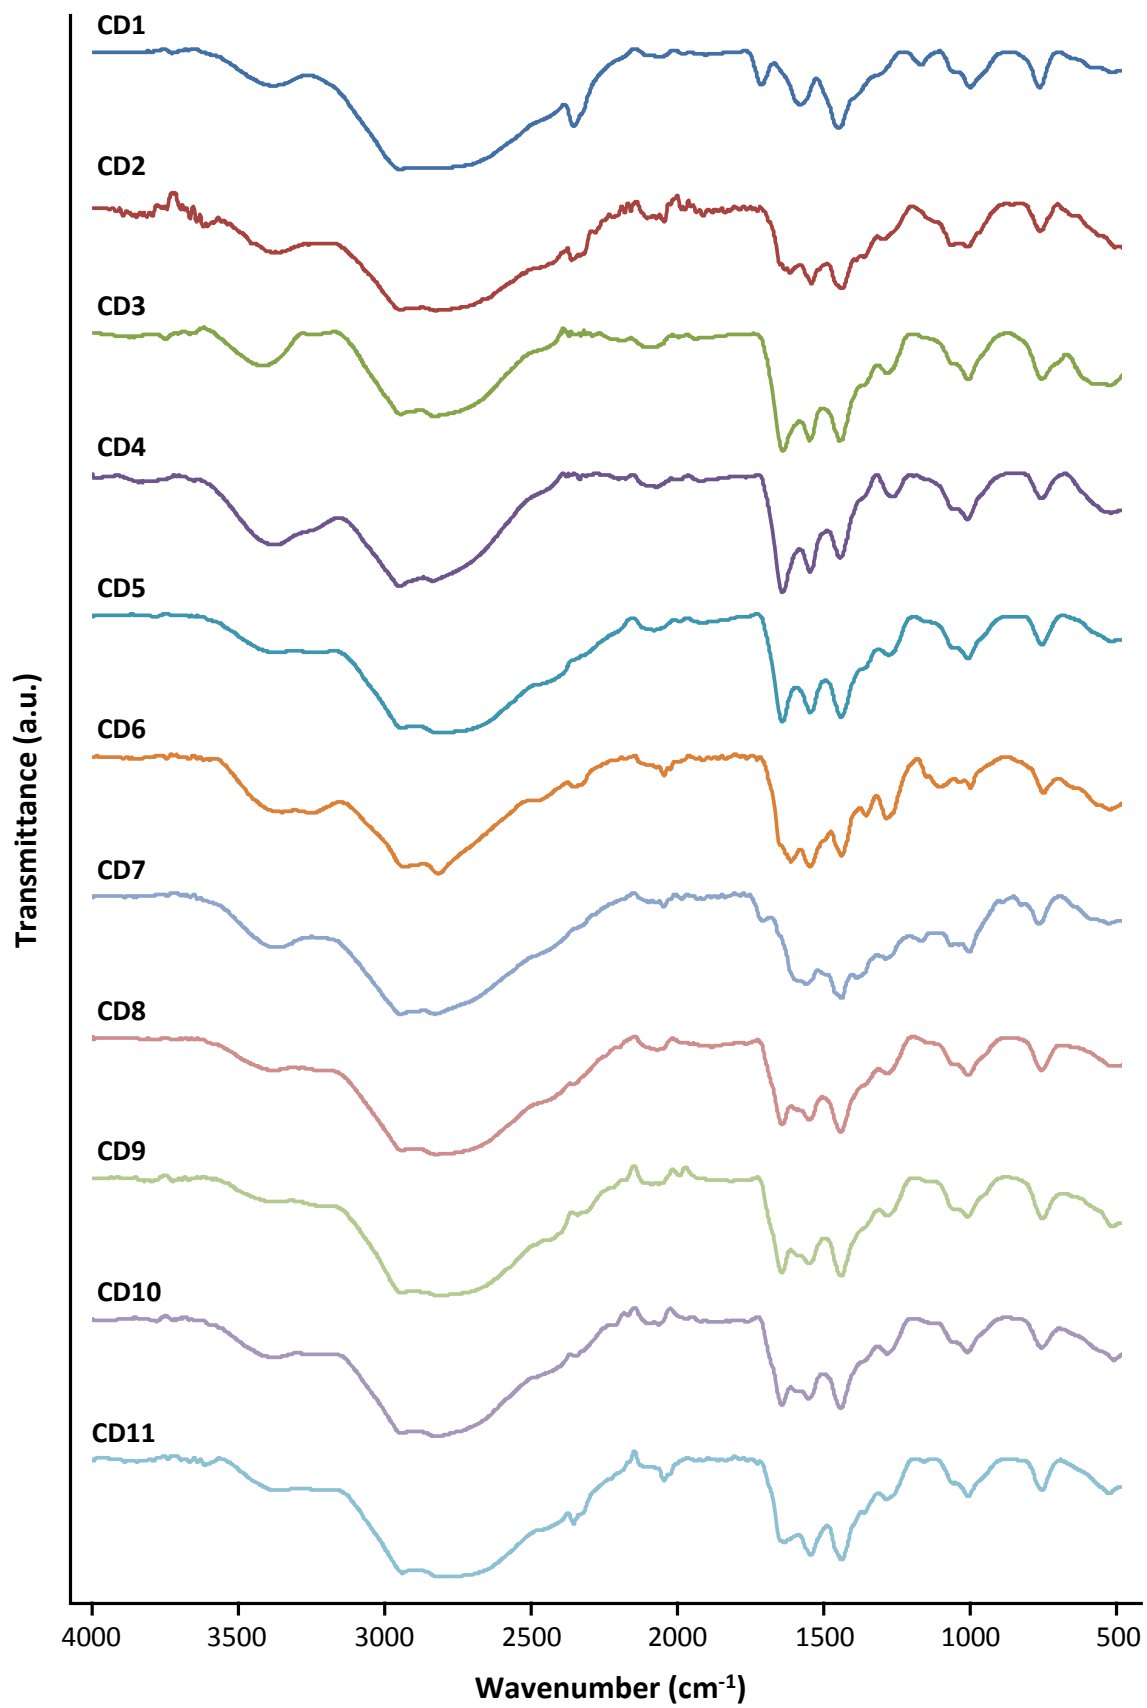

Fig. S2 FT-IR spectra of CD1-CD11.

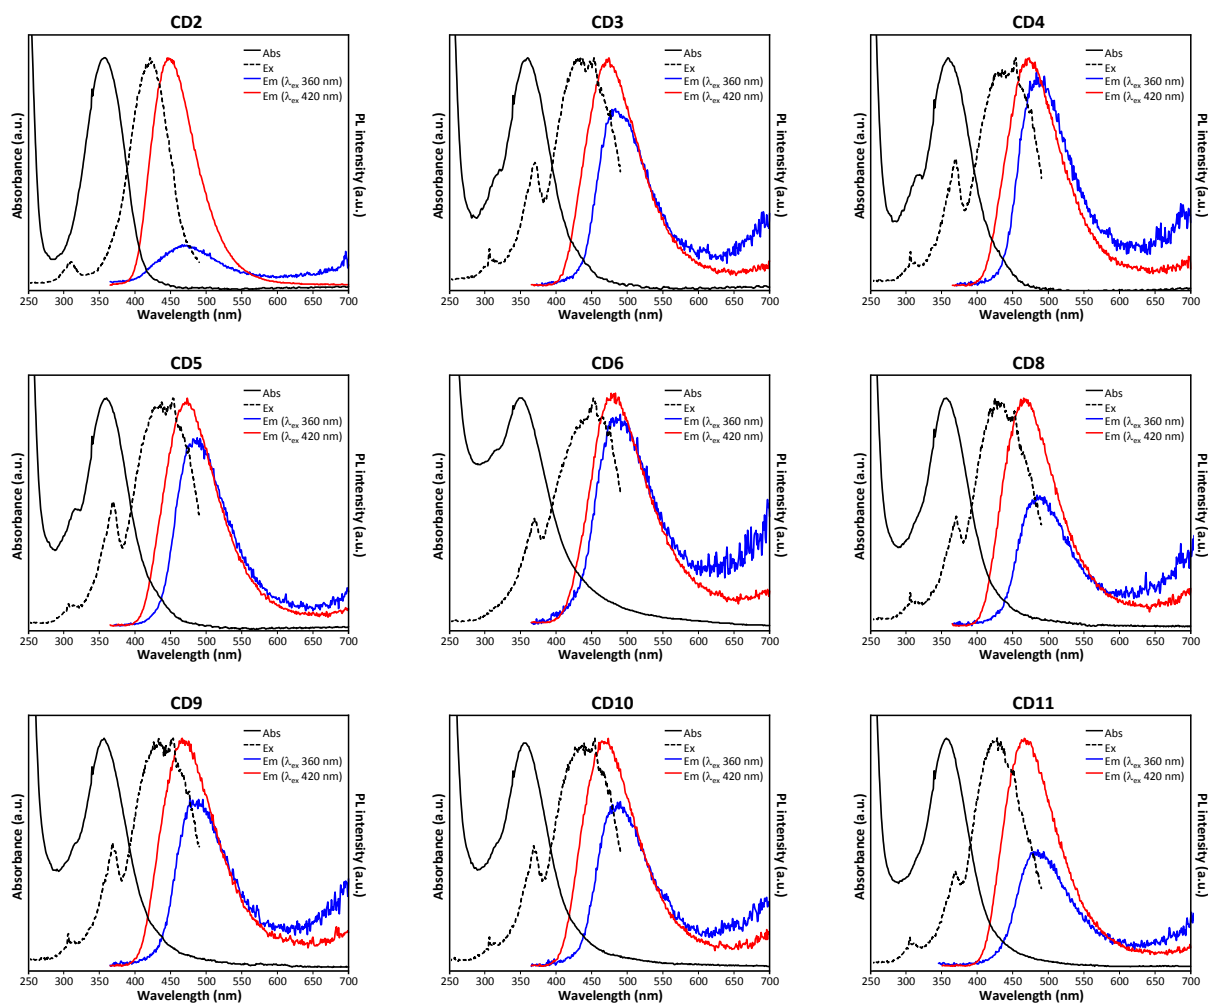

**Fig S3.** Absorption and PL spectra of the as-produced CDs.

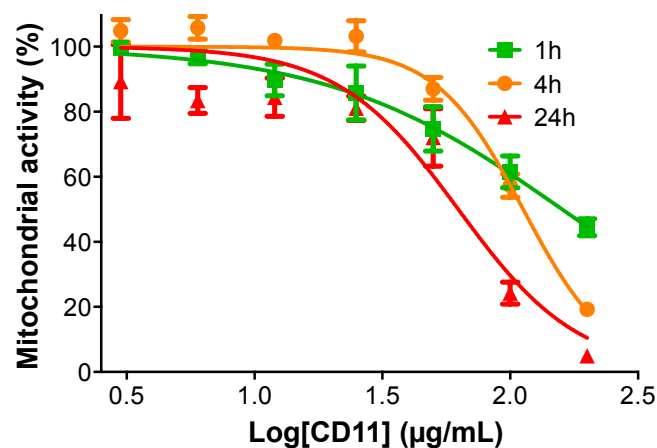

**Fig S4.** Effects of CD11 on the viability of A549 cells. Cells were treated with increasing concentrations (3-200 μg/mL) of the CDs for 1, 4, and 24 h and viability was assessed with the MTT assay. Results are reported as % mitochondrial activity based on the control untreated cells normalized to 100 %. Data shown are representative of triplicate determinations (mean ± SD).

**Table S1** Elemental analysis (C, H, N) of the as-produced CDs.

| <b>Sample</b> | <b>C (%)</b> | <b>H (%)</b> | <b>N (%)</b> |
|---------------|--------------|--------------|--------------|
| <b>CD1</b>    | 29.76        | 8.07         | 16.94        |
| <b>CD2</b>    | –            | –            | –            |
| <b>CD3</b>    | 33.07        | 8.09         | 17.31        |
| <b>CD4</b>    | 32.84        | 8.06         | 16.52        |
| <b>CD5</b>    | 33.95        | 7.88         | 16.82        |
| <b>CD6</b>    | 37.20        | 8.00         | 17.01        |
| <b>CD7</b>    | 31.65        | 8.08         | 16.72        |
| <b>CD8</b>    | 34.23        | 8.02         | 18.44        |
| <b>CD9</b>    | 33.77        | 8.30         | 17.20        |
| <b>CD10</b>   | 36.52        | 8.53         | 18.60        |
| <b>CD11</b>   | 37.28        | 8.76         | 18.36        |
